# Supplementary material
Source: publisher site journal article supplement (https://www.dovepress.com/article/445878)
Supplement: Supplementary file 1 [file get_supplementary_file.php]

**Supplementary Table 1:** Multivariate logistic regression of *Leptospira* seropositivity in relation to the variable age, education and CD4 cell counting

| Variables | Categories | B | Std Error | Df | Exp(B) | P-value |
| --- | --- | --- | --- | --- | --- | --- |
| Age range | 18-28 | 0.539 | 0.647 | 1 | 1.714 | 0.405 |
| 29-38 | 0.889 | 0.532 | 1 | 2.432 | 0.094 |
| 39-49 | 0.824 | 0.561 | 1 | 2.280 | 0.142 |
| Education | Illiterate | -0.336 | 0.918 | 1 | 0.714 | 0.714 |
| Primary | -0.268 | 0.723 | 1 | 0.846 | 0.817 |
| Secondary | -0.182 | 0.709 | 1 | 0.833 | 0.797 |
| High school | -0.223 | 0.671 | 1 | 0.800 | 0.739 |
| CD4 cells/ul | <250 | 0.752 | 0.408 | 2 | 2.121 | 0.173 |
| 250-500 | 0.366 | 0.468 | 1 | 1.442 | 0.066 |
| >500 | -0.836 | 0.332 | 1 | 0.433 | 0.433 |
